# Supplementary material for: Bias in random forest variable importance measures: Illustrations, sources and a solution
Source: Springer Nature journal article supplement (doi:10.1186/1471-2105-8-25), 2007-01-25

**randomForest, replace=TRUE**

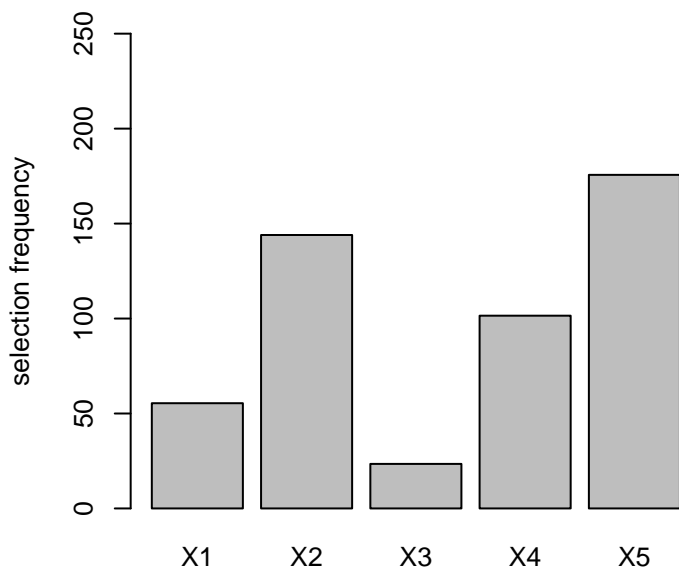

**randomForest, replace=FALSE**

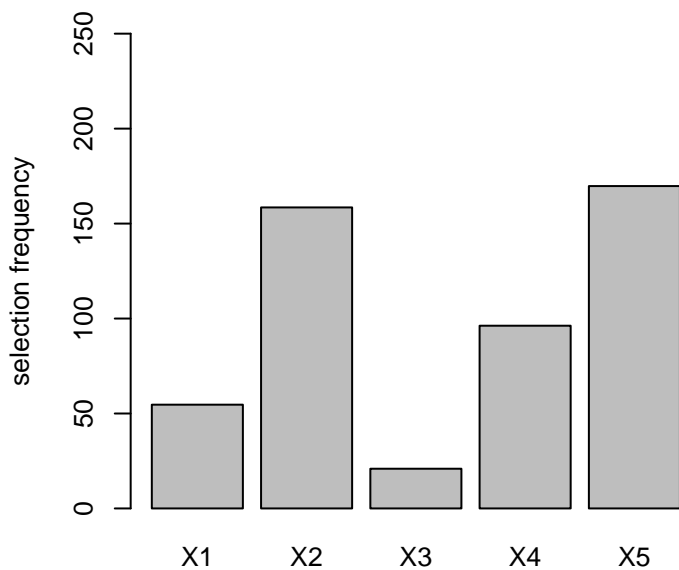

**cforest, replace=TRUE**

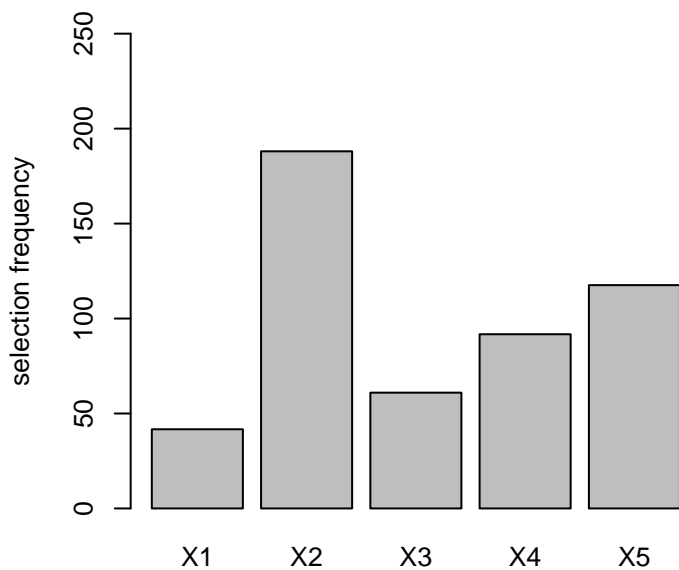

**cforest, replace=FALSE**

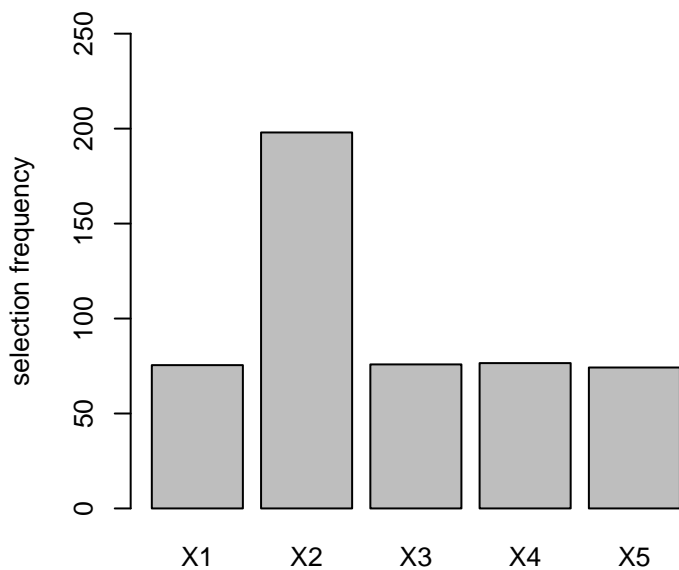

Supplement: 12859_2006_1397_MOESM6_ESM.pdf [file 12859_2006_1397_MOESM6_ESM.pdf]
