# Supplementary figures and images for: Bias in random forest variable importance measures: Illustrations, sources and a solution
Source: Springer Nature journal article supplement (doi:10.1186/1471-2105-8-25), 2007-01-25

relative variable selection frequency

**rpart**

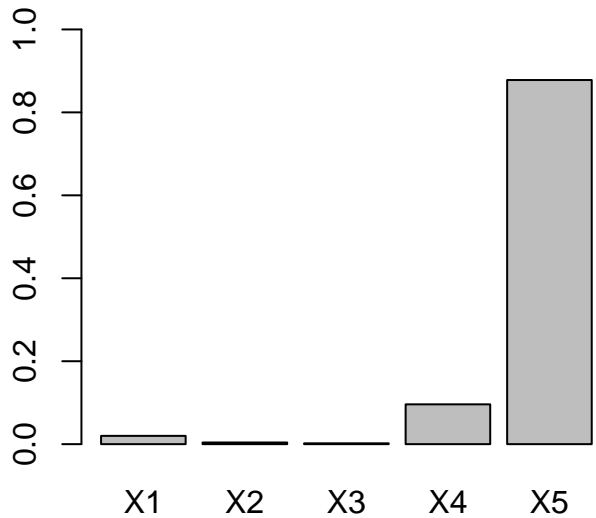

**ctree**

relative variable selection frequency

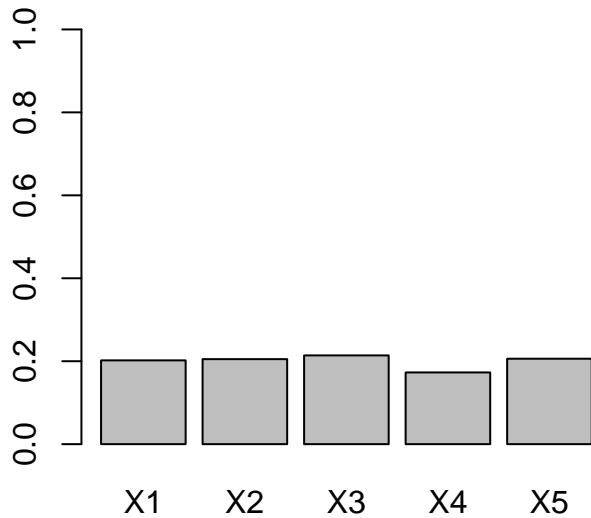

Supplement: 12859_2006_1397_MOESM11_ESM.pdf [file 12859_2006_1397_MOESM11_ESM.pdf]

**before bootstrapping**

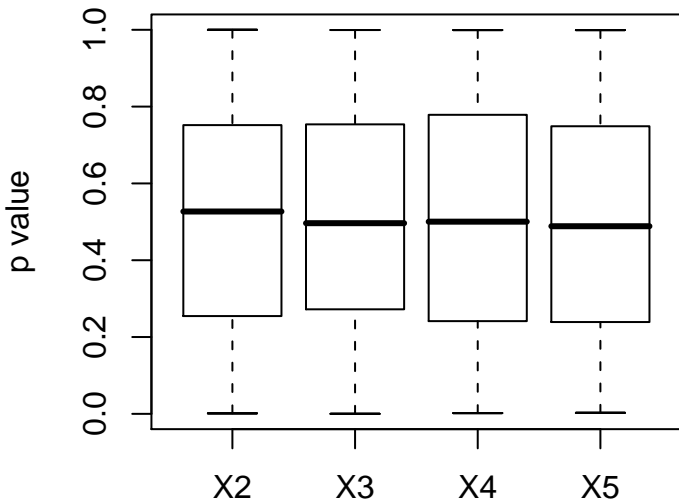

**after bootstrapping**

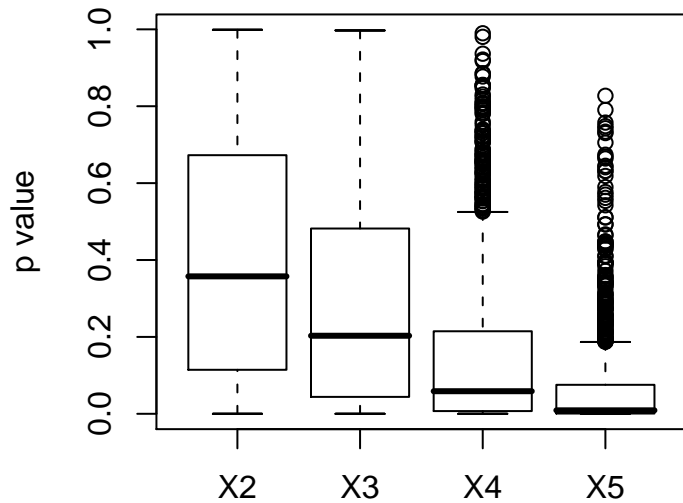

Supplement: 12859_2006_1397_MOESM12_ESM.pdf [file 12859_2006_1397_MOESM12_ESM.pdf]

**randomForest, replace=TRUE**

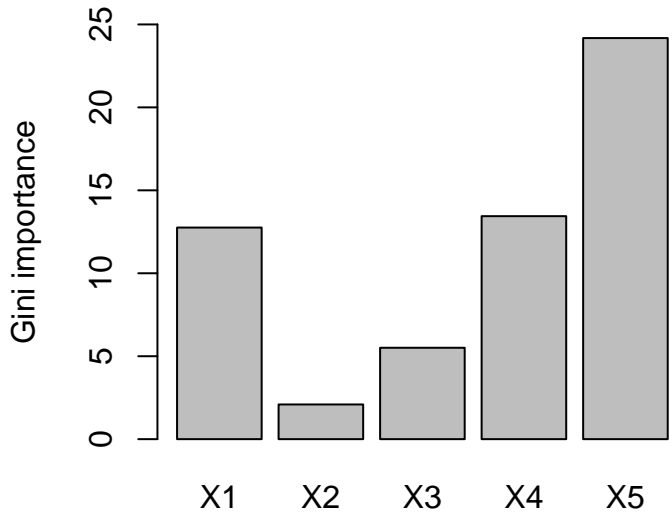

**randomForest, replace=FALSE**

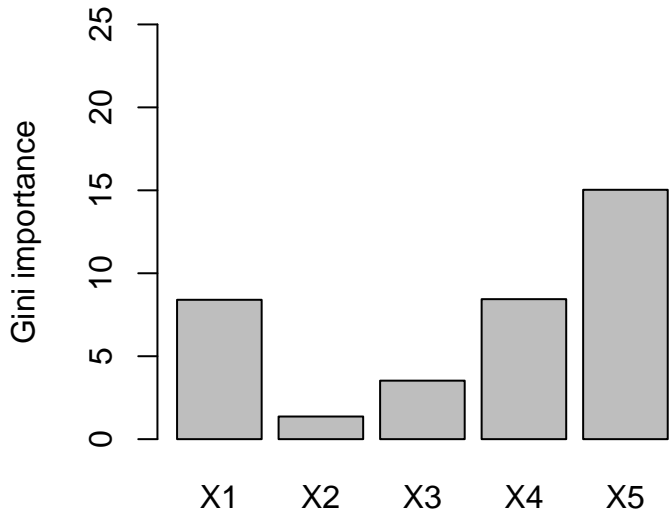

Supplement: 12859_2006_1397_MOESM3_ESM.pdf [file 12859_2006_1397_MOESM3_ESM.pdf]

**randomForest, replace=TRUE**

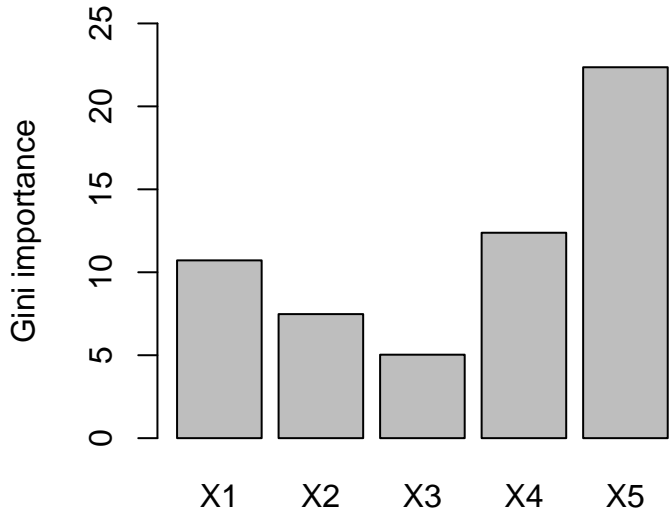

**randomForest, replace=FALSE**

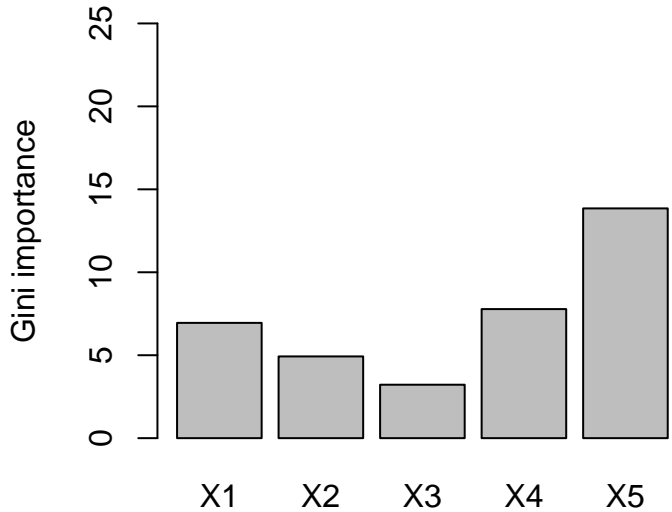

Supplement: 12859_2006_1397_MOESM7_ESM.pdf [file 12859_2006_1397_MOESM7_ESM.pdf]
